# Supplementary material
Source: Springer Nature journal article supplement (https://www.springermedizin.de/resource/supplementary/12936_2008_596_MOESM5_ESM.pdf/9547786)

### A: IgG1

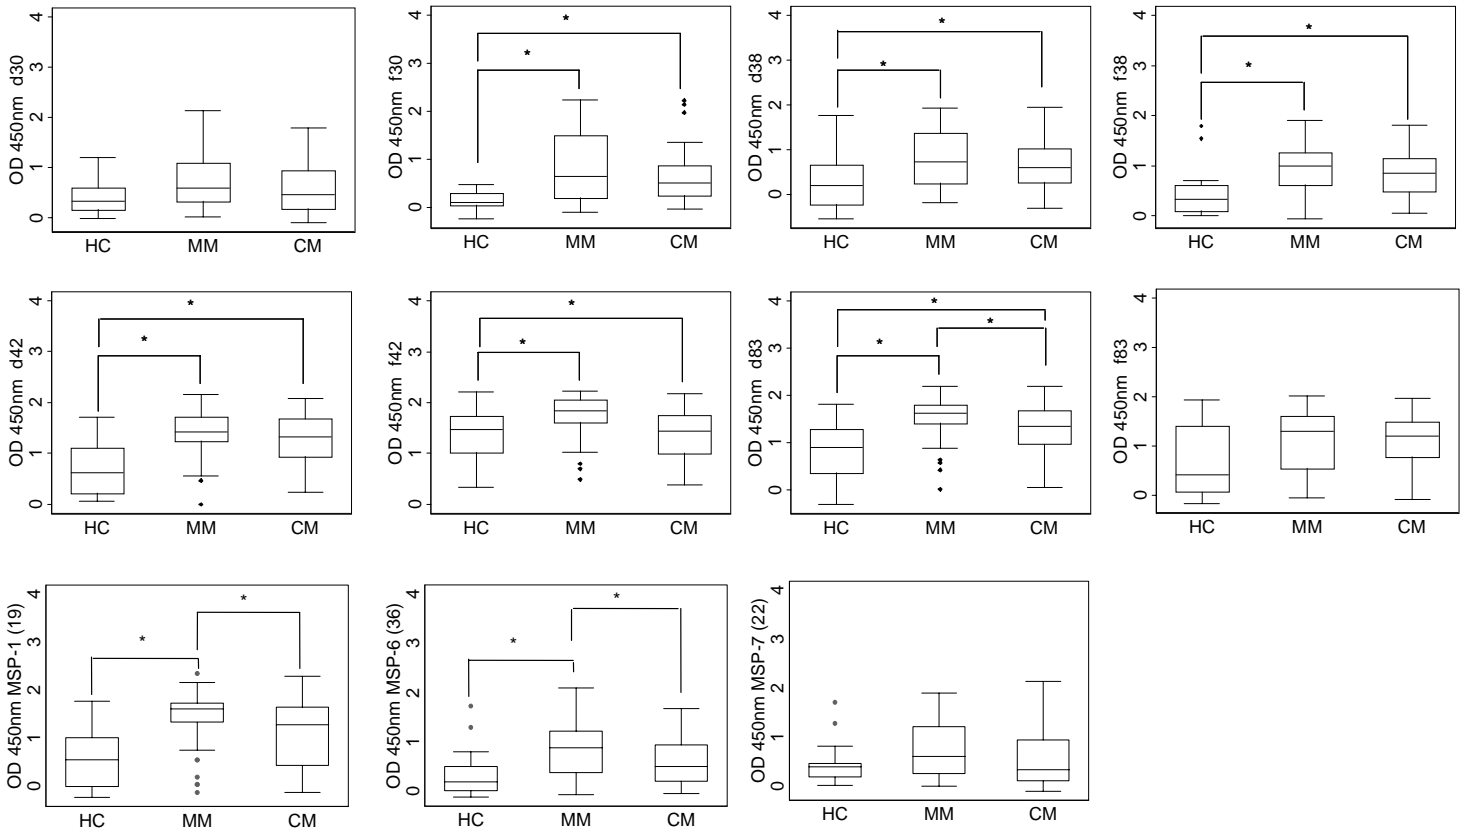

### B: IgG3

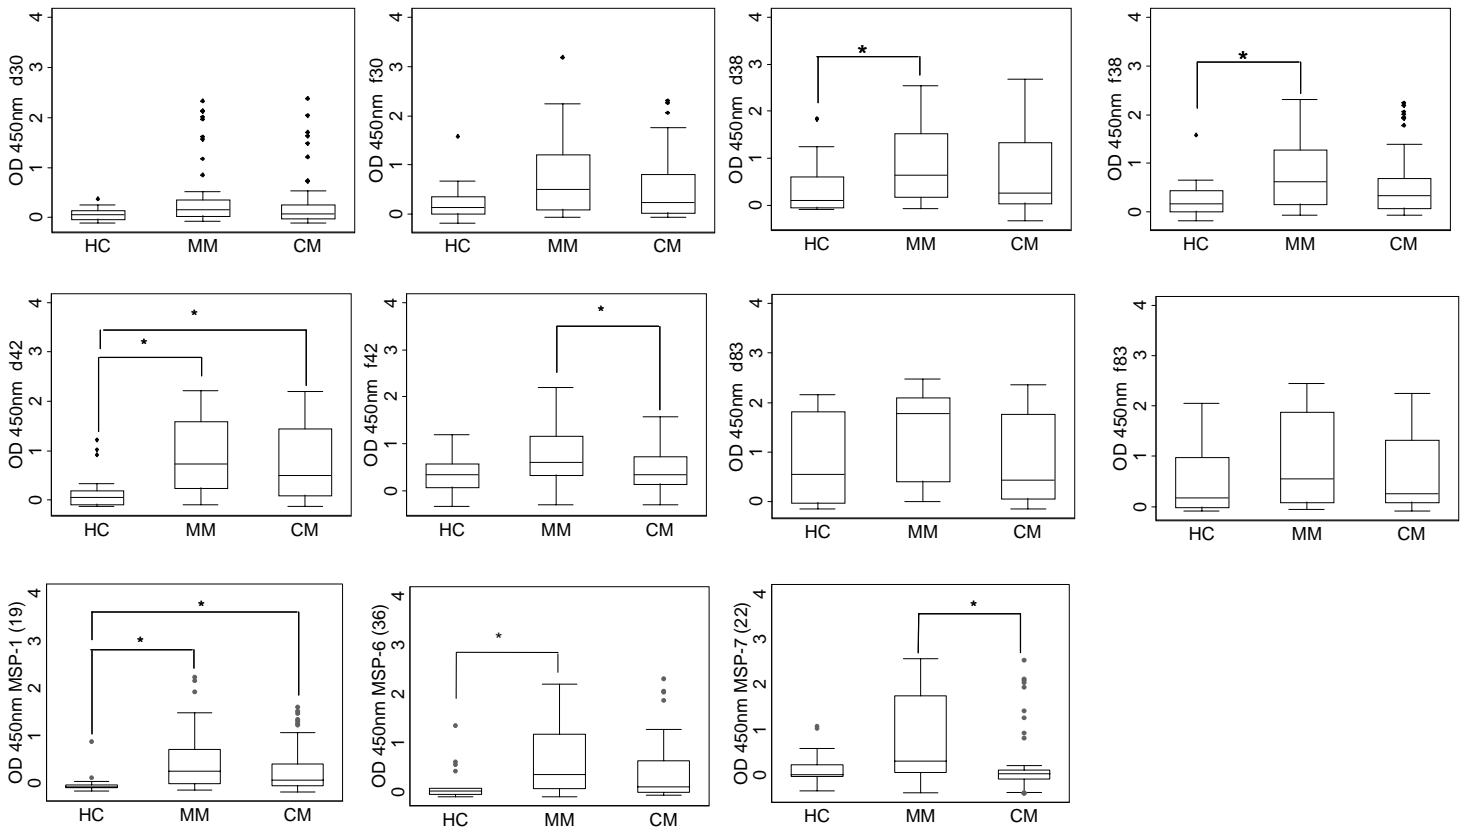

Supplement: MOESM5 [file 9547786]
